# Supplementary material
Source: PubMed Central journal article supplement (PMC8044056)

**A****GV Surface Area:  
With I-Pores vs Without I-Pores**

■ GVs with I-pores (n = 90)  
■ GVs without I-pores (n = 90)

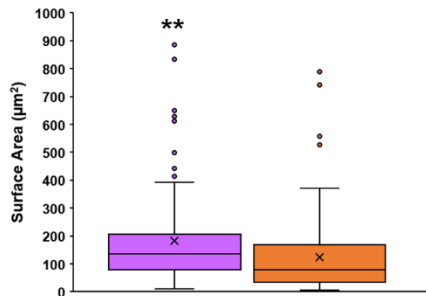**B****GV Surface Area:  
GVs with Single I-Pore vs. Multiple I-pores**

■ GVs with a single I-pore (n = 57)  
■ GVs with multiple I-pores (n = 33)

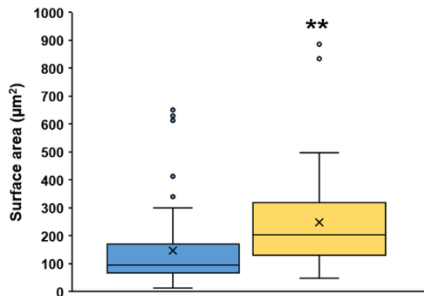**C****GV Surface Area:  
Types I-IV**

■ Type I (n = 19) ■ Type II (n = 71)  
□ Type III (n = 11) □ Type IV (n = 79)

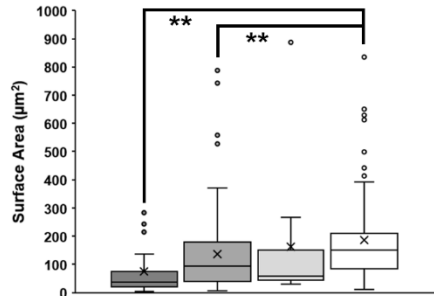**D****GV Maximal Cross-Sectional Area:  
with I-Pores vs. Without I-Pores**

■ GVs with I-pores (n = 90)  
■ GVs without I-pores (n = 90)

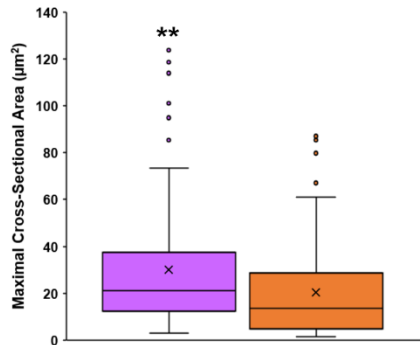**E****GV Maximal Cross-Sectional Area:  
GVs with Single I-Pores vs. Multiple I-Pores**

■ GVs with a single I-pore (n = 57)  
■ GVs with multiple I-pores (n = 33)

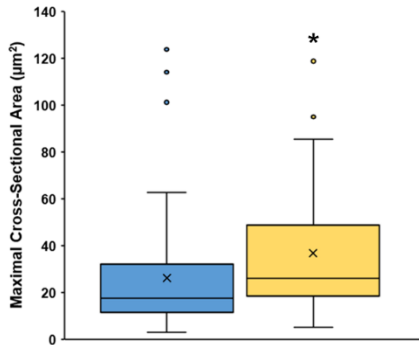**F****GV Maximal Cross-Sectional Area:  
Types I-IV**

■ Type I (n = 19) ■ Type II (n = 71)  
□ Type III (n = 11) □ Type IV (n = 79)

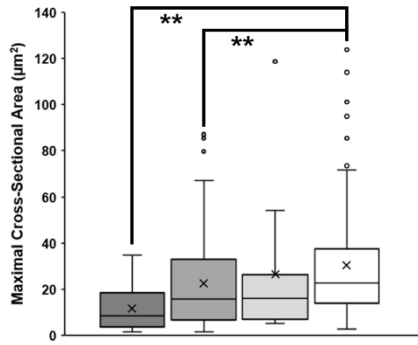

Supplement: NIHMS1674195-supplement-2.pdf [file NIHMS1674195-supplement-2.pdf]
