# Supplementary material
Source: PubMed Central journal article supplement (PMC8044056)
Supplement: NIHMS1674195-supplement-4.pdf [file NIHMS1674195-supplement-4.pdf]

1 **Supplementary Figure Legends**

2 **Supplemental Figure S1. Giant vacuoles with I-pores: percentages with a single I-**  
3 **pore or multiple I-pores**

4 Overall, of the total 477 giant vacuoles (GVs) observed with at least one I-pore, 397  
5 (83.2%) had a single I-pore, and 80 (16.8%) had more than one I-pore. 13.2% had two I-  
6 pores, 2.7% had three I-pores, 0.4% had 4 I-pores, and only 2 GV of the 477 GV  
7 observed with I-pores had 6 I-pores (0.4%). The proportions of GV with a single I-pore  
8 or multiple I-pores were similar when analyzed by flow-type area; however, the range in  
9 non-flow area was 1-3 I-pores/GV, whereas high- and low-flow had ranges of 1-6 I-  
10 pores/GV.

11 **Supplemental Figure S2. Surface area and maximal cross-sectional area of 180 3D-**  
12 **reconstructed giant vacuoles**

13 **A:** Median surface area of reconstructed giant vacuoles (GVs) with I-pores ( $35.62 \mu\text{m}^2$ ,  
14 IQR:  $79.27 - 205.11$ ) was significantly larger than GV without I-pores ( $78.16 \mu\text{m}^2$ , IQR:  
15  $32.99 - 169.02$ ,  $P \leq 0.01$ ). **B:** Median surface area of reconstructed GV with multiple I-  
16 pores ( $201.82 \mu\text{m}^2$ , IQR:  $134.92 - 317.01$ ) was significantly larger than GV with a single  
17 I-pore ( $93.90 \mu\text{m}^2$ , IQR:  $66.60 - 167.61$ ;  $P \leq 0.01$ ). **C:** Median surface area of GV Types  
18 I-IV: **Type I:** no basal opening or I-pore; **Type II:** basal opening, no I-pore; **Type III:** with  
19 I-pore, no basal opening; **Type IV:** both basal opening and I-pore. Median surface area  
20 of Type I GV was  $36.98 \mu\text{m}^2$  (IQR:  $20.73 - 74.30$ ), Type II was  $93.86 \mu\text{m}^2$  (IQR:  $39.75 -$   
21  $178.62$ ), Type III was  $58.01 \mu\text{m}^2$  (IQR:  $45.30 - 137.84$ ), and Type IV was  $150.56 \mu\text{m}^2$   
22 (IQR:  $84.46 - 210.56$ ). Median surface area of Type IV GV was significantly larger than  
23 Types I and II (both  $P \leq 0.01$ ). **D:** Median maximal cross-sectional area (CSA) of

24 reconstructed GVs with I-pores (21.29  $\mu\text{m}^2$ , IQR: 12.44 – 37.34) was significantly larger  
25 compared to GVs without I-pores (13.66  $\mu\text{m}^2$ , IQR: 4.82 – 28.77;  $P \leq 0.01$ ). **E:** Median  
26 maximal CSA of GVs with multiple I-pores (25.87  $\mu\text{m}^2$ , IQR: 19.01 – 47.44) was  
27 significantly larger than GVs with a single I-pore (17.49  $\mu\text{m}^2$ , IQR: 11.52 – 31.61;  $P =$   
28 0.02). **F:** Median maximal CSA of Type I GVS was 8.56  $\mu\text{m}^2$  (IQR: 3.76 – 18.46), Type II  
29 was 15.96  $\mu\text{m}^2$  (IQR: 6.63 – 32.92), Type III was 16.11  $\mu\text{m}^2$  (IQR: 7.21 – 26.36), Type IV  
30 was 22.71  $\mu\text{m}^2$  (IQR: 14.02 – 37.70). Type IV GV maximal CSA was significantly larger  
31 than Type I ( $P \leq 0.01$ ) and Type II ( $P = 0.04$ ) GVs.

### 32 **Supplemental Figure S3. Shapes of 180 3D-reconstructed giant vacuoles**

33 **A:** Example of a 3D-reconstructed giant vacuole (GV). **B:** SBF-SEM cross section through  
34 the GV shown in **(A)**. **C:** Example of a 3D-reconstructed collapsed GV. **D:** SBF-SEM cross  
35 section through the GV shown in **(C)**. **E:** Similar percentages of round and collapsed GVs  
36 had I-pores (49.7%, 52.9%) or not (50.3%, 47.1%, respectively). **F:** Box plots showing the  
37 distributions of volumes of round vs. collapsed GVs. Median volume of round GVs (85.15  
38  $\mu\text{m}^3$ , IQR: 32.21 – 202.88;  $n = 163$ ) was not significantly smaller than collapsed GVs  
39 (139.13  $\mu\text{m}^3$ , IQR: 40.86 – 233.72;  $n = 17$ ;  $P > 0.05$ ). *Whiskers:* 1.5 interquartile range.  
40  $\bar{X}$  = mean.
