# Supplementary material
Source: PubMed Central journal article supplement (PMC8044056)

## Giant Vacuoles with I-Pores: Percentages with a Single I-Pore or Multiple I-Pores

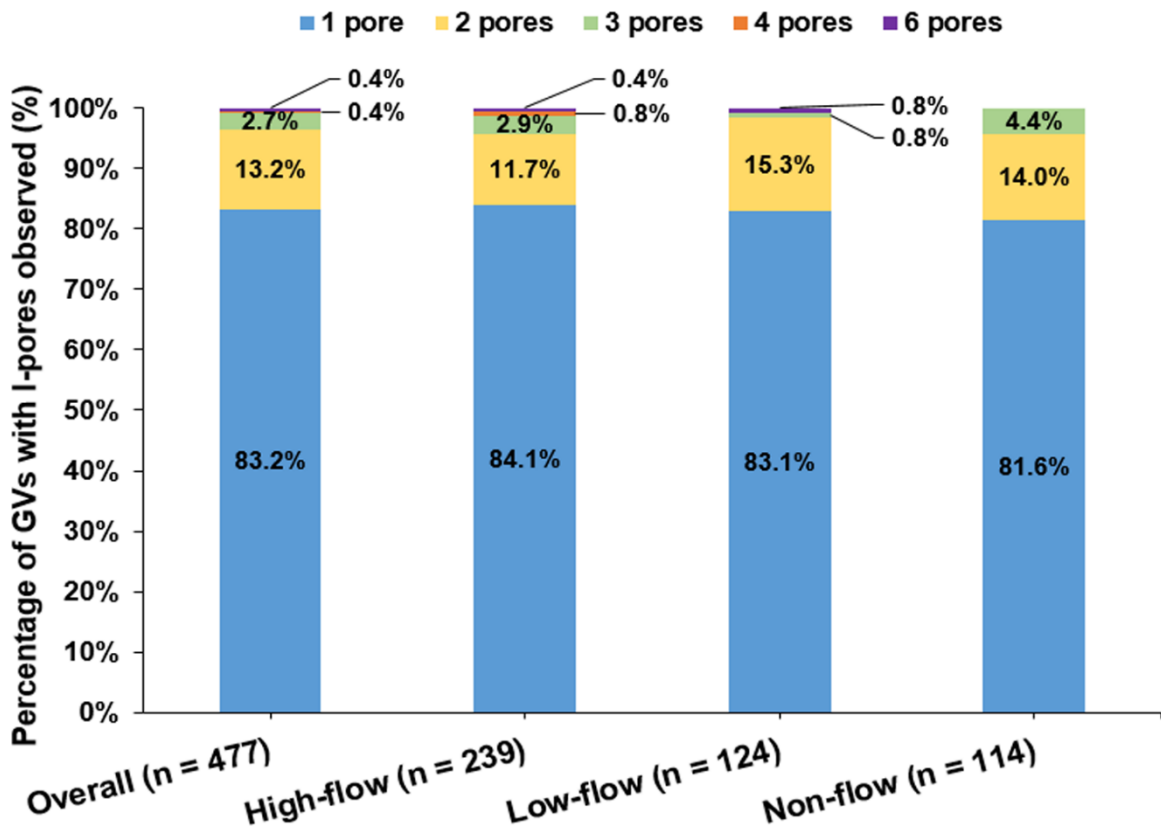

Supplement: NIHMS1674195-supplement-1.pdf [file NIHMS1674195-supplement-1.pdf]

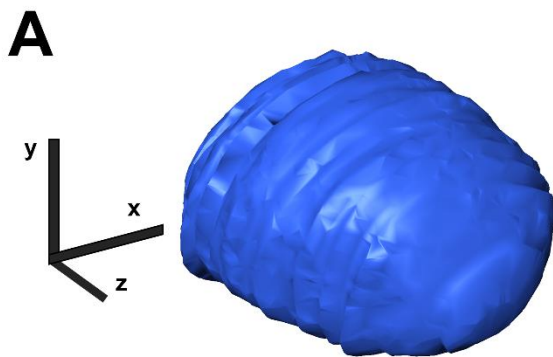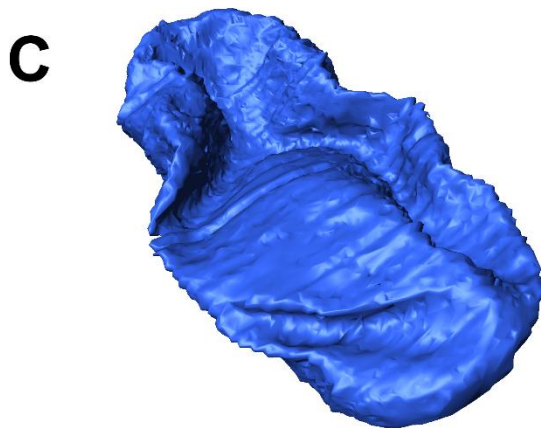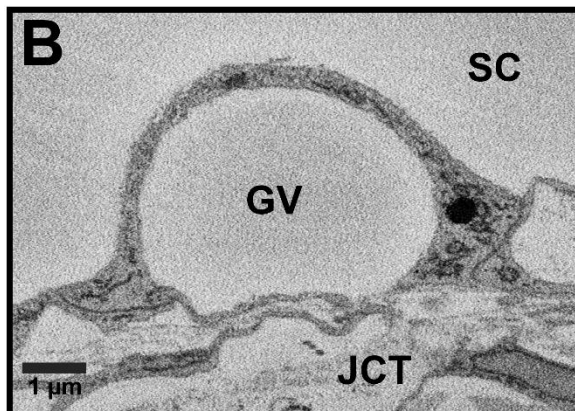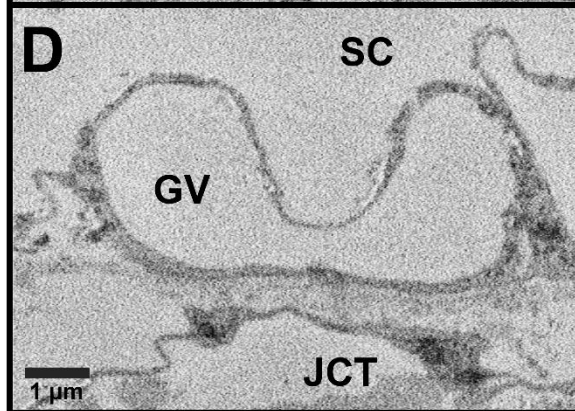

**E** Percentage of GV Shapes with and without Pores

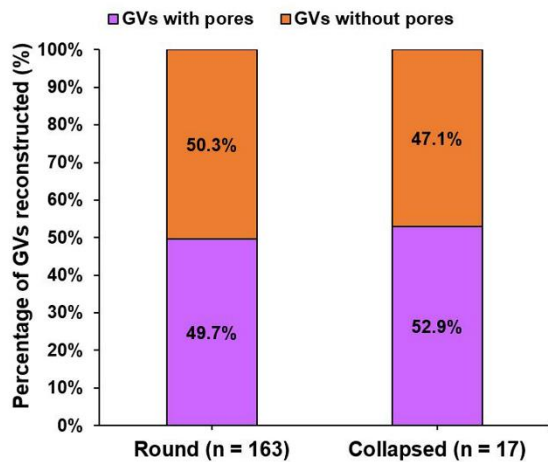

**F** GV Volumes: Round vs. Collapsed

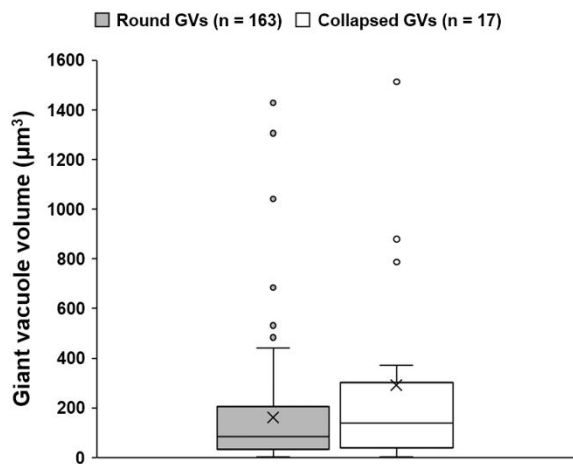

Supplement: NIHMS1674195-supplement-3.pdf [file NIHMS1674195-supplement-3.pdf]
